# Supplementary material for: Investigating multiscale meteorological controls and impact of soil moisture heterogeneity on radiation fog in complex terrain using semi-idealised simulations
Source: Copernicus journal article supplement (doi:10.5194/acp-23-14451-2023), 2023-11-23
Supplement: Supplementary file 1 [file acp-23-14451-2023-supplement.zip]

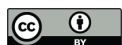

## *Supplement of*

# **Investigating multiscale meteorological controls and impact of soil moisture heterogeneity on radiation fog in complex terrain using semi-idealised simulations**

**Dongqi Lin et al.**

*Correspondence to:* Dongqi Lin (dongqi.lin@canterbury.ac.nz)

- acp-23-14451-2023-supplement-title-page.pdf
- supplements
  - fog\_to\_domain4\_81m\_het
    - \* INPUT
  - supplement\_sensitivity\_test.pdf

The copyright of individual parts of the supplement might differ from the article licence.
